# Supplementary material for: Parallel comparison of fibroblast-like synoviocytes from the surgically removed hyperplastic synovial tissues of rheumatoid arthritis and osteoarthritis patients
Source: PubMed Central journal article supplement (PMC6898940; doi:10.1186/s12891-019-2977-2), 2019-12-07

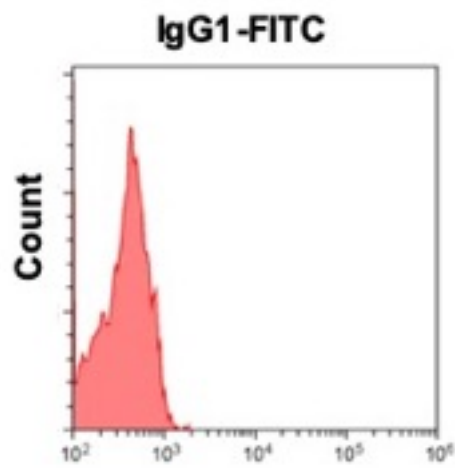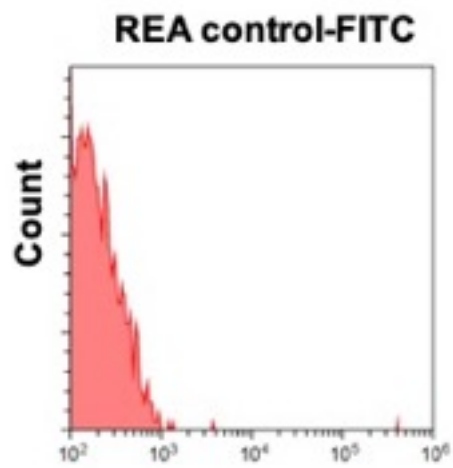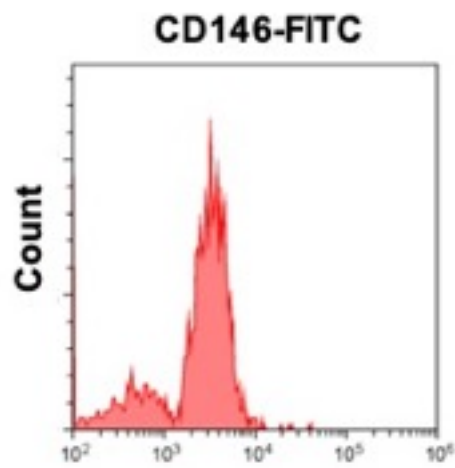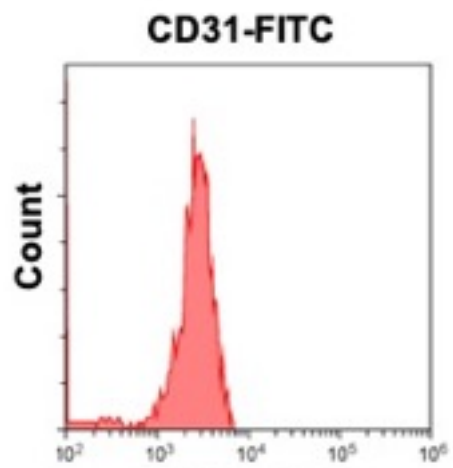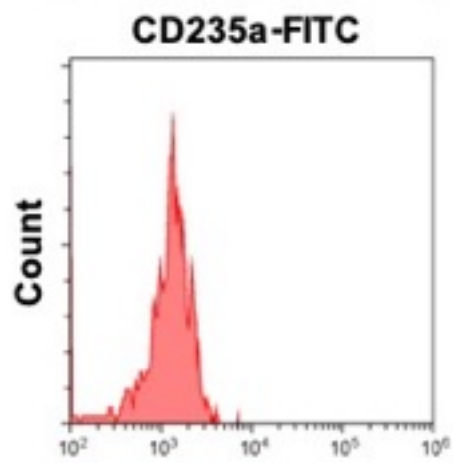

Supplement: 12891_2019_2977_MOESM1_ESM.pdf [file 12891_2019_2977_MOESM1_ESM.pdf]
